# Supplementary material for: Viruses interact with hosts that span distantly related microbial domains in dense hydrothermal mats
Source: Springer Nature journal article supplement (doi:10.1038/s41564-023-01347-5), 2023-04-06
Supplement: MOESM1 [file 41564_2023_1347_MOESM1_ESM.pdf]

# **Viruses interact with hosts that span distantly related microbial domains in dense hydrothermal mats**

---

In the format provided by the  
authors and unedited

### A. M1

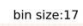

B. M2

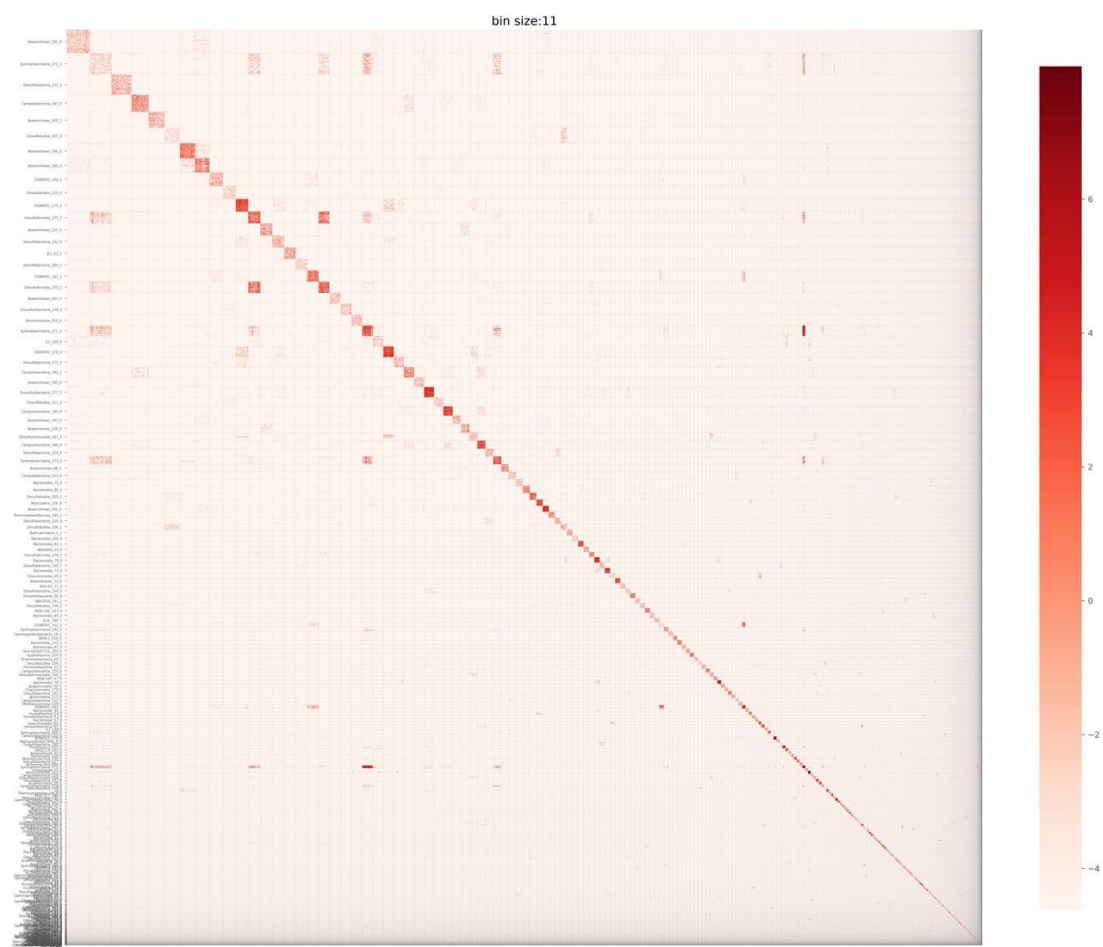

### C. M3

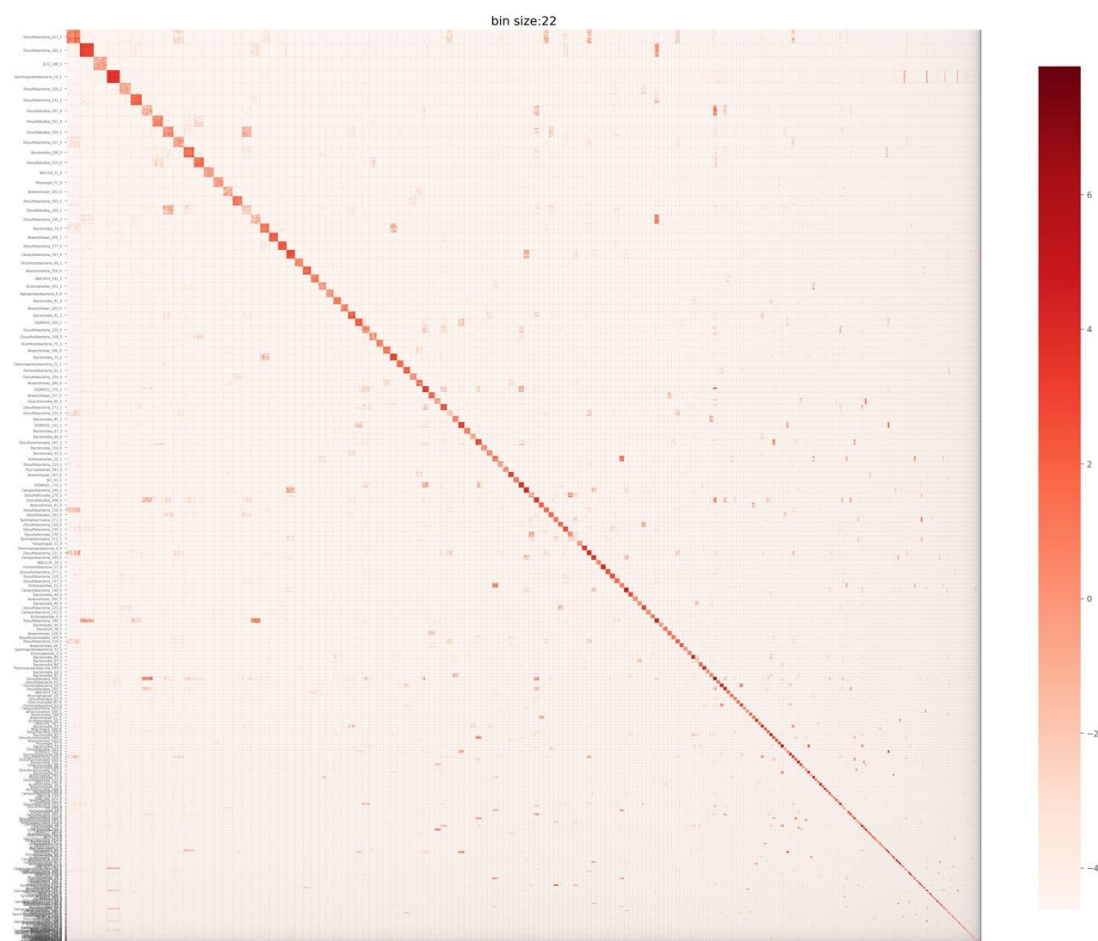

D. M4

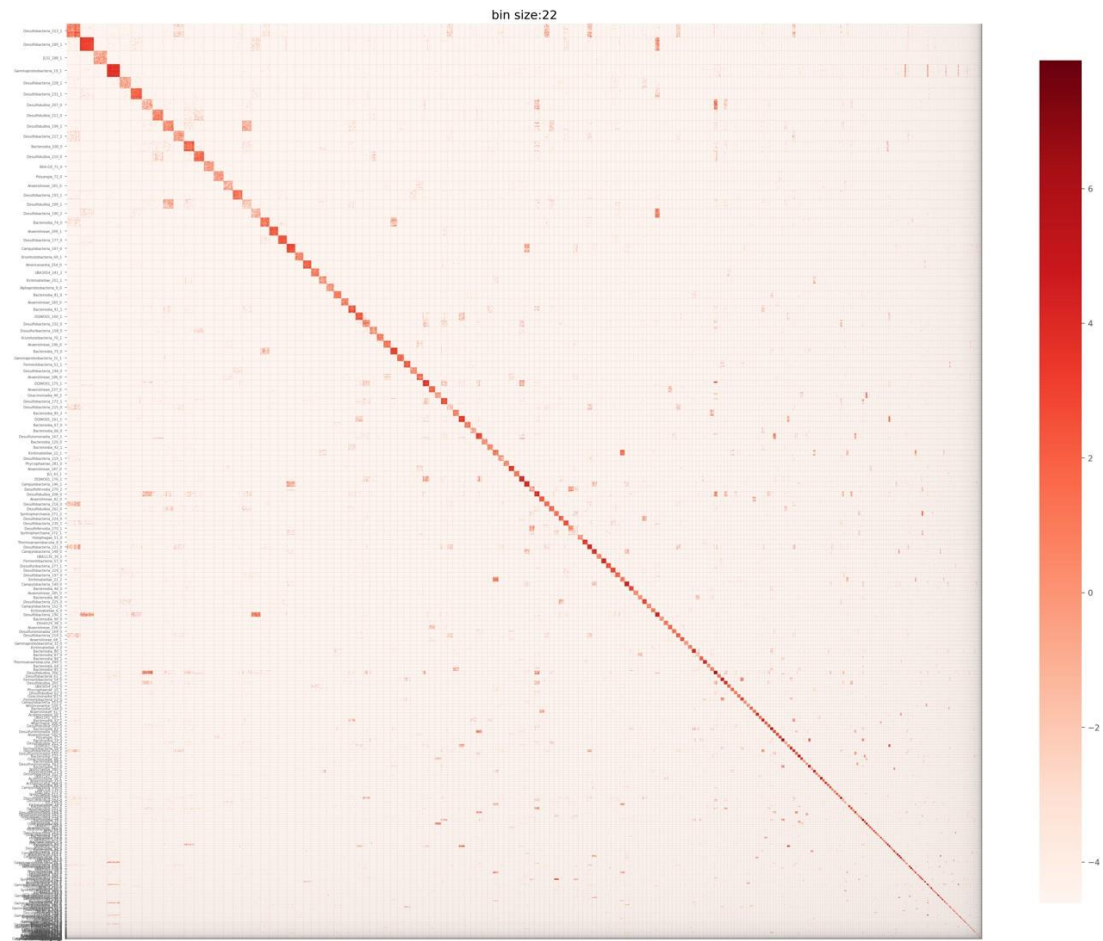

E. M5

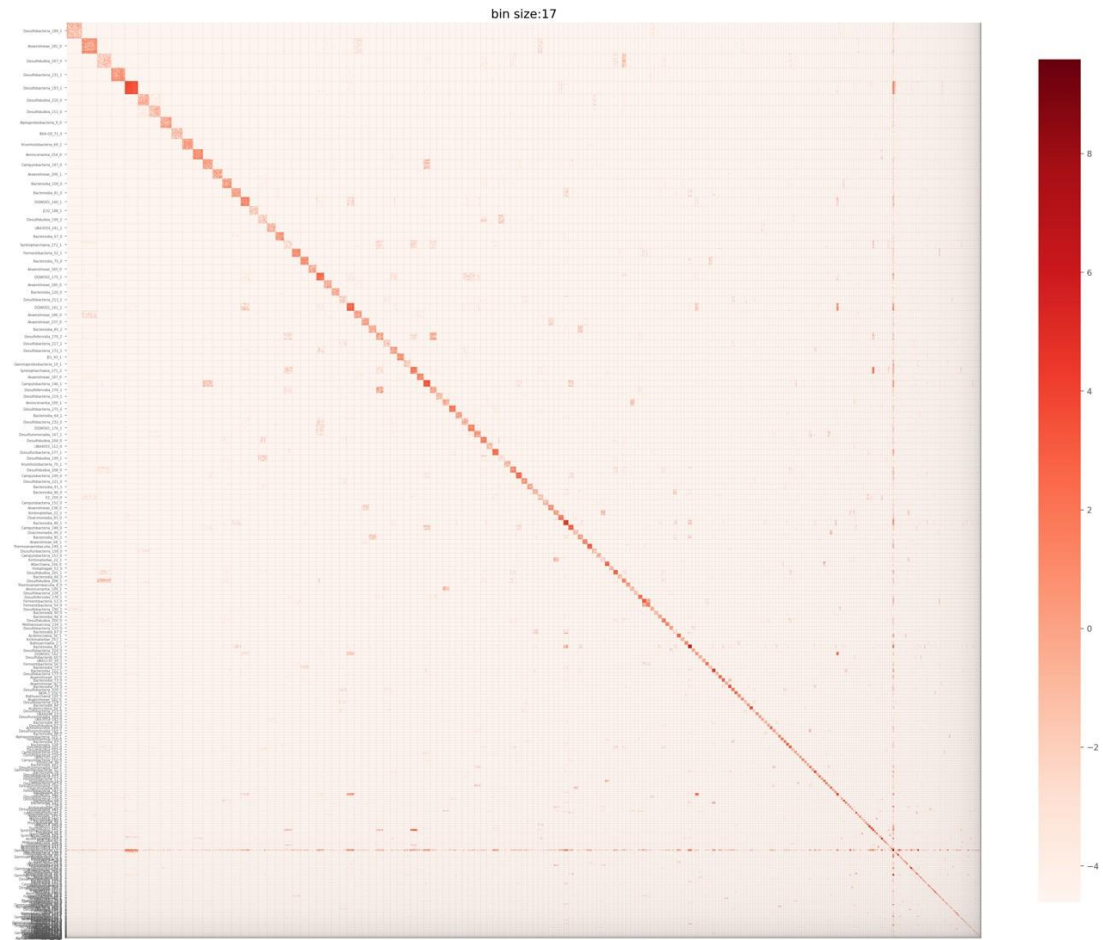



### F. M6

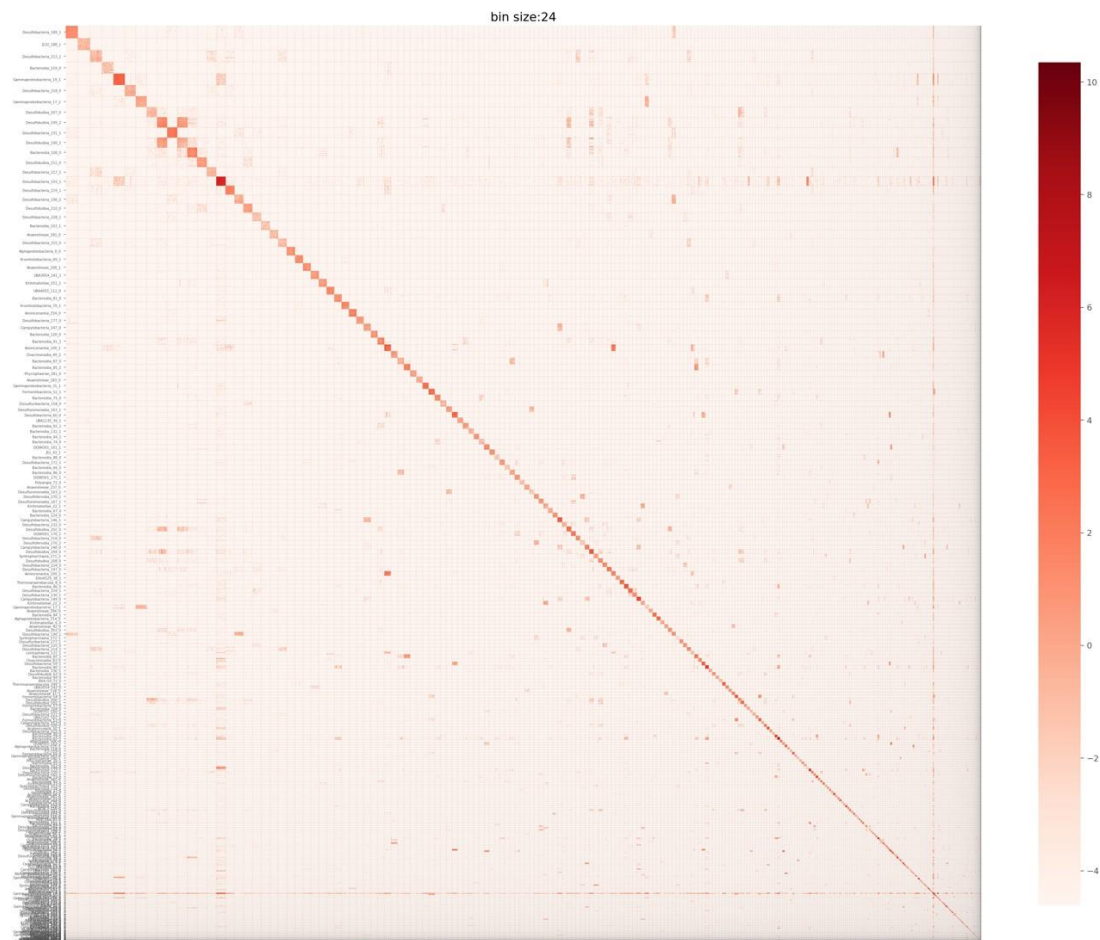

**G. M7**

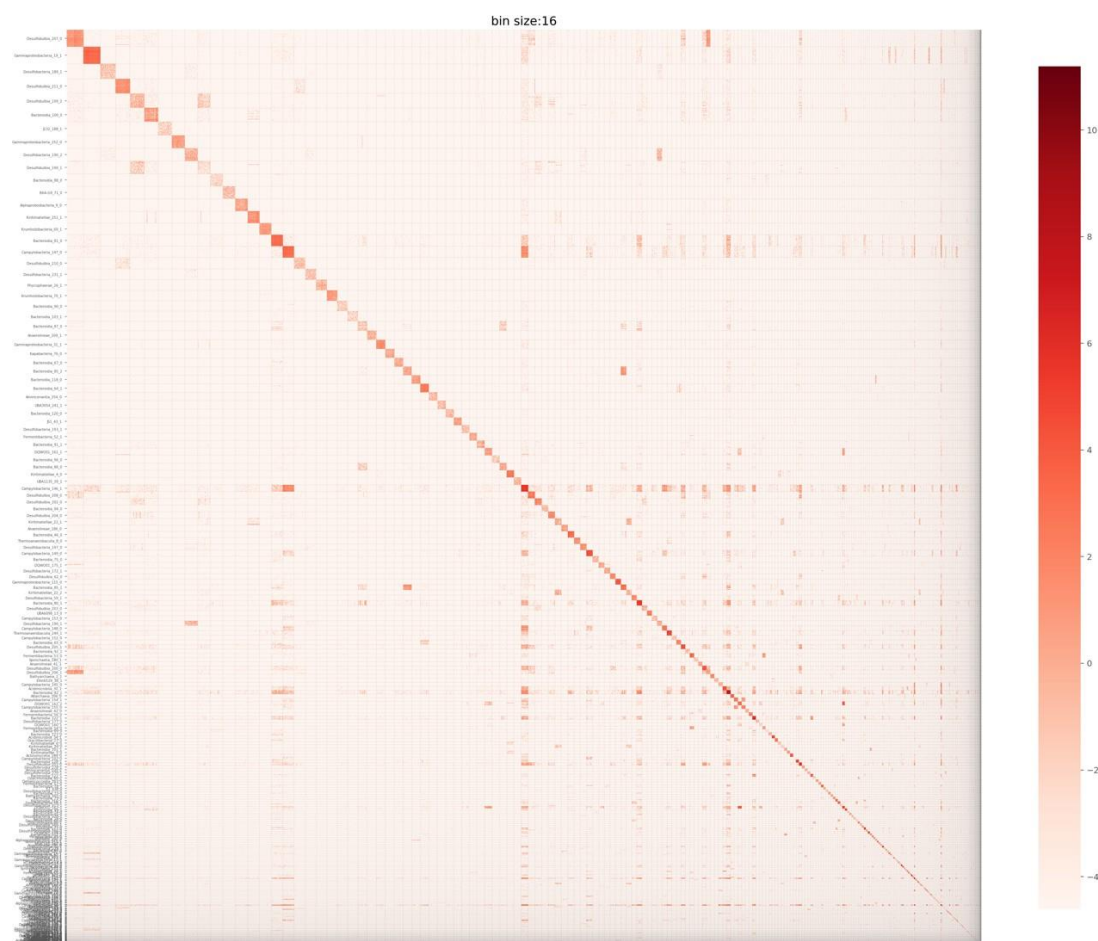



**H. M8**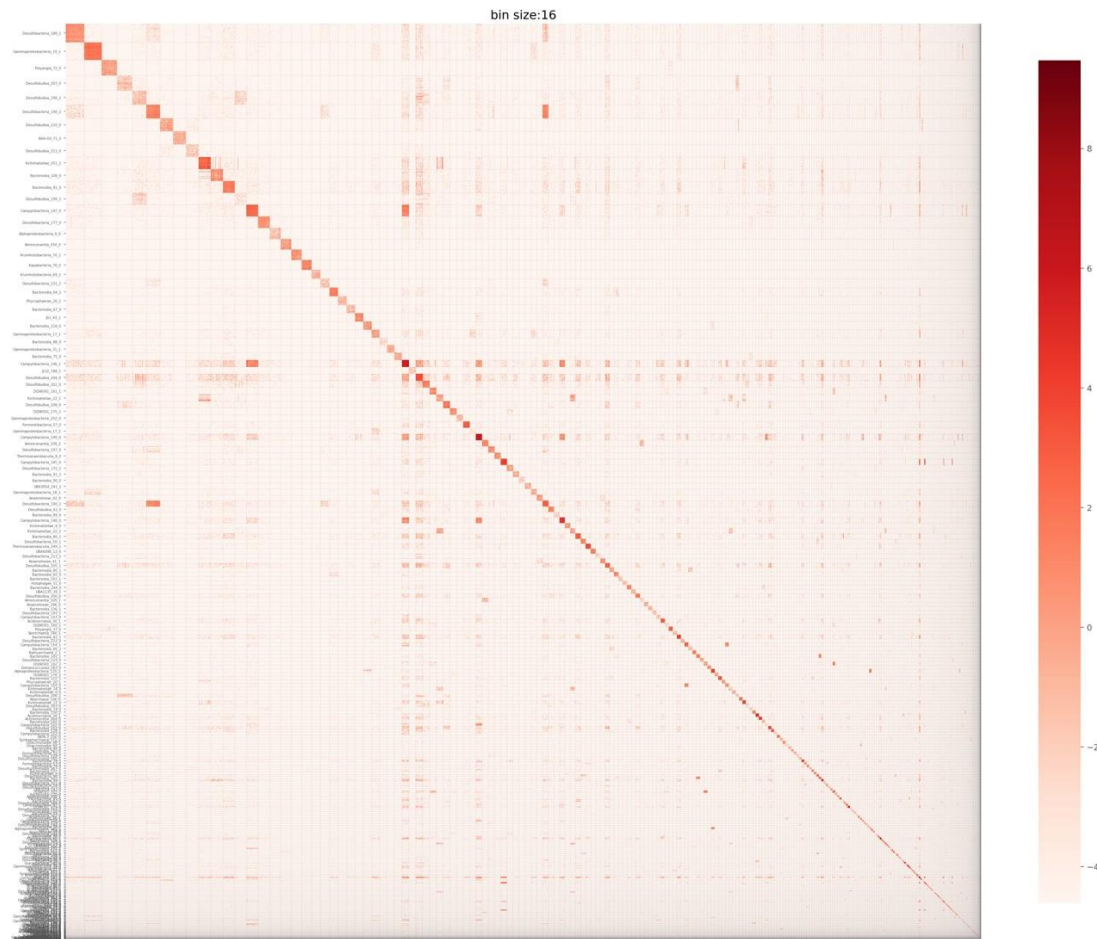

## I. M9

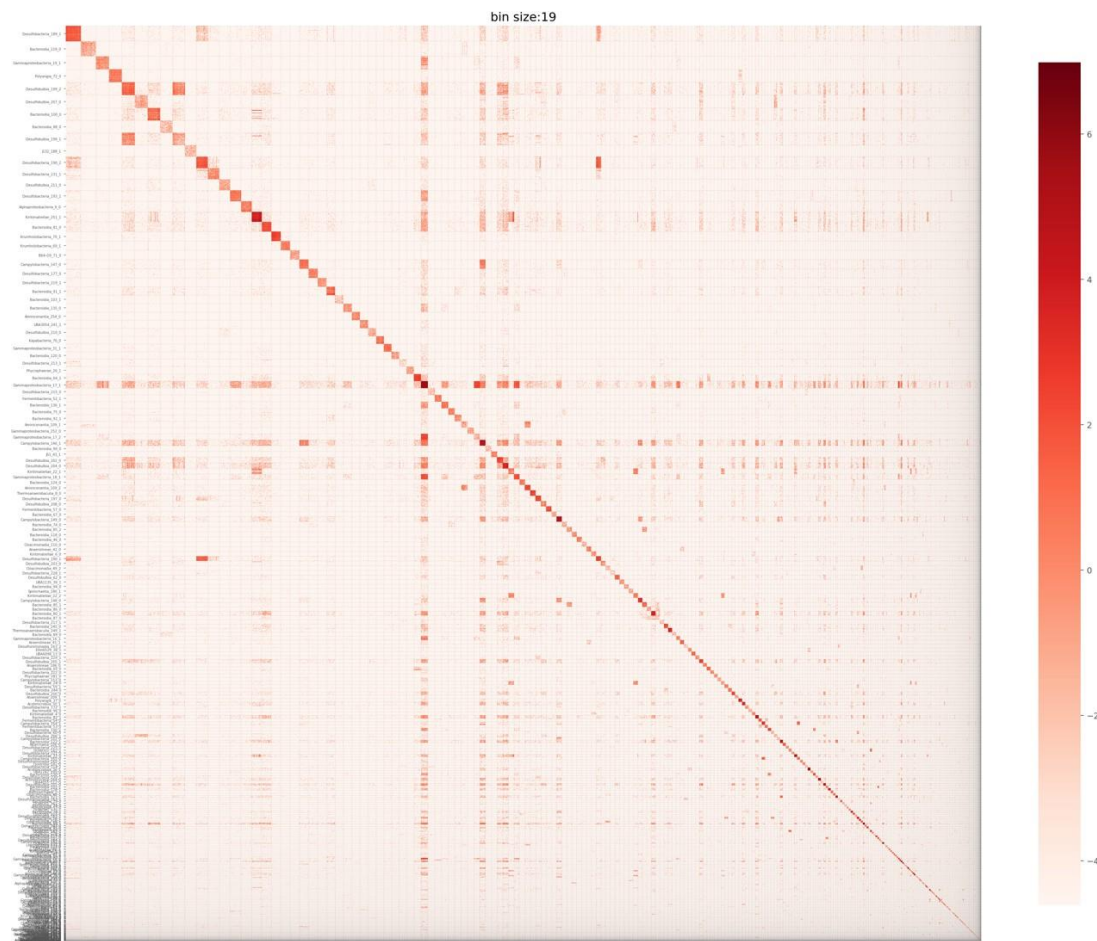

**J. M10**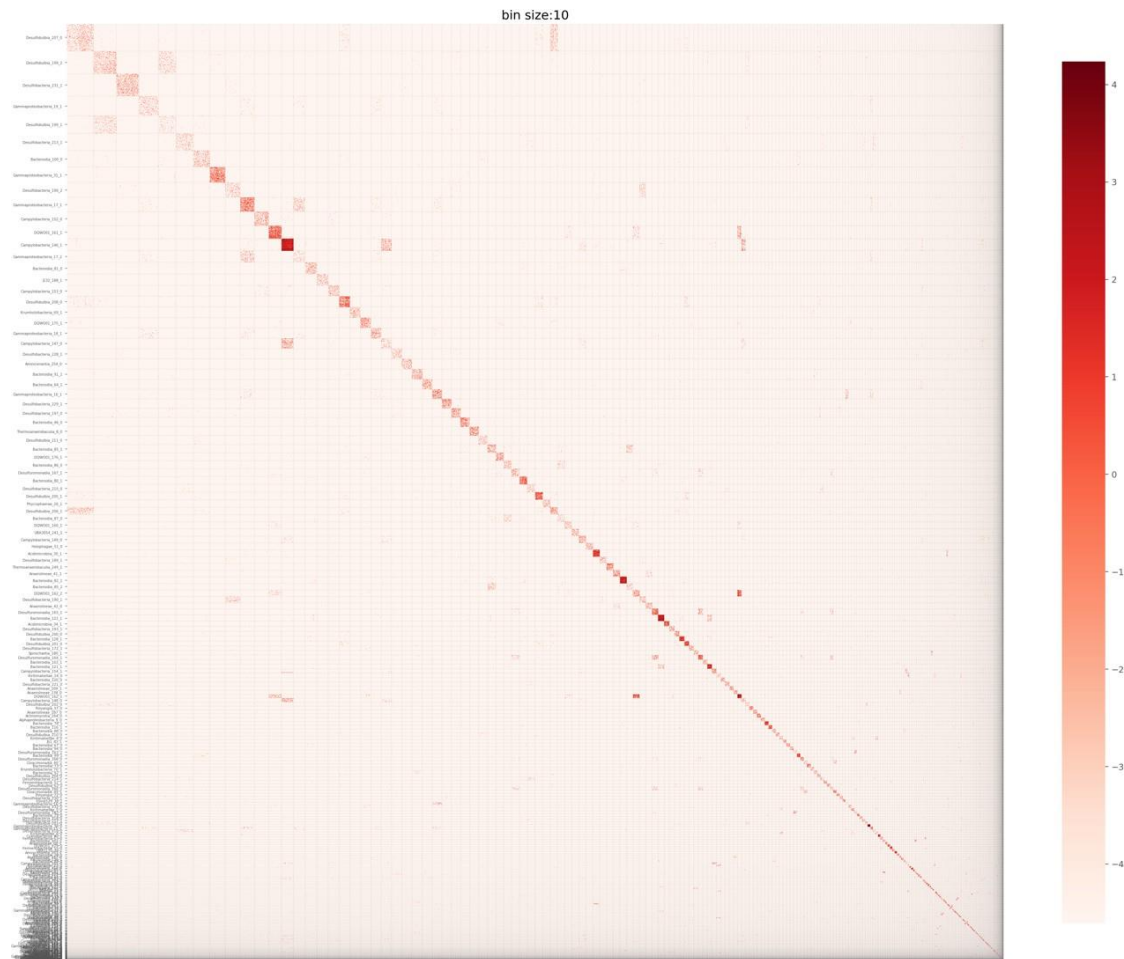

**Figure S1A-J. Hi-C mapping based contact matrices for samples M1-M10.** Normalized contacts were log transformed with  $\chi = 0.01$  and matrices were down-sampled using the mean across the bin size. Y-axis labels correspond to the MAG the contig belongs to.
